# Supplementary material for: Au(i)-, Ag(i)-, and Pd(ii)-coordination-driven diverse self-assembly of an N-heterocyclic carbene-based amphiphile
Source: Royal Society of Chemistry journal article supplement (doi:10.1039/d1ra02719k), 2021-01-01
Supplement: d1ra02719k1.pdf [file d1ra02719k1.pdf]

*Electronic Supplementary Information (ESI) of*

# **Au (I), Ag(I), and Pd(II)-coordination driven diverse self-assembly of an *N*-heterocyclic carbene-based amphiphile**

Toshiaki Taira, \*<sup>a</sup> Takaya yanagimoto<sup>b</sup>, Kenichi Sakai<sup>b</sup>, Hideki Sakai<sup>b</sup> and Tomohiro Imura<sup>a</sup>

<sup>a</sup>*Research Institute for Chemical Process Technology, National Institute of Advanced Industrial Science and Technology (AIST), Central 5-2, 1-1 Higashi, Tsukuba, Ibaraki 305-8565, Japan*

<sup>b</sup>*Faculty of Science and Technology, Tokyo University of Science, 2641 Yamazaki, Noda, Chiba 278-8510, JAPAN*

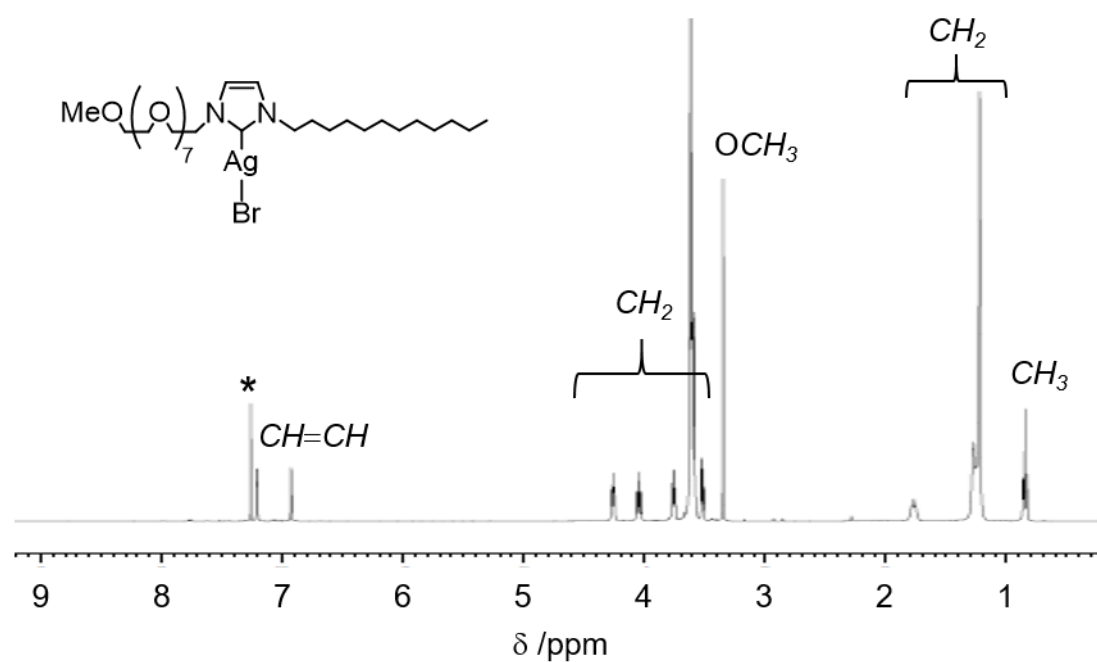

**Fig. S1**  $^1\text{H}$  NMR spectrum of Ag-MS (400 MHz,  $\text{CDCl}_3$ , r.t.). Asterisk represents residual solvent.

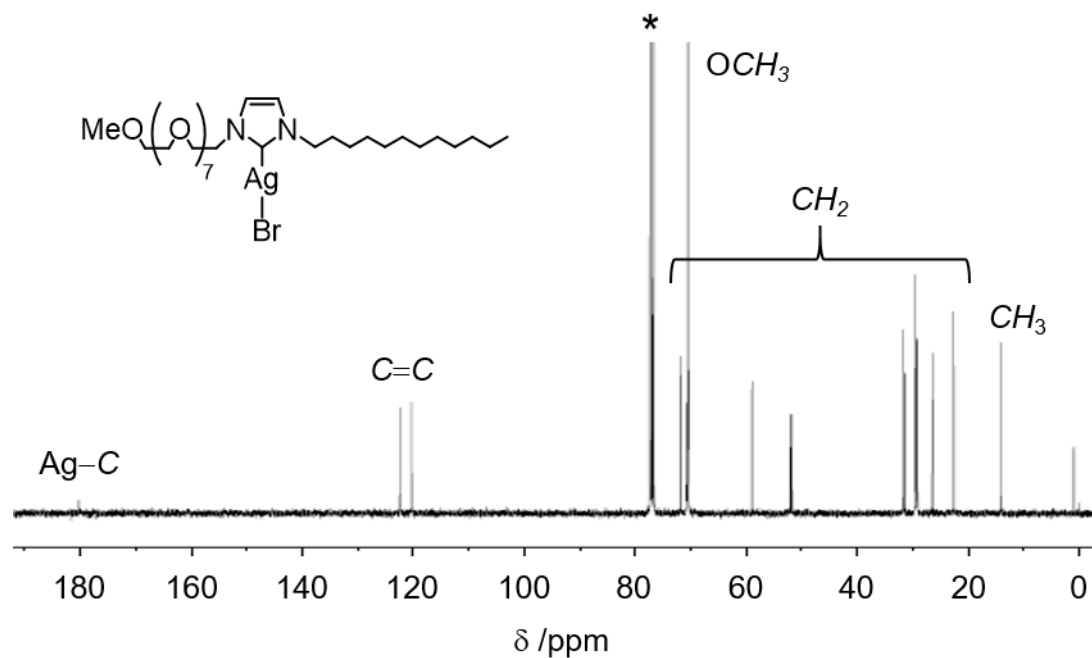

**Fig. S2**  $^{13}\text{C}$  NMR spectrum of Ag-MS (100 MHz,  $\text{CDCl}_3$ , r.t.) Asterisk represents residual solvent.

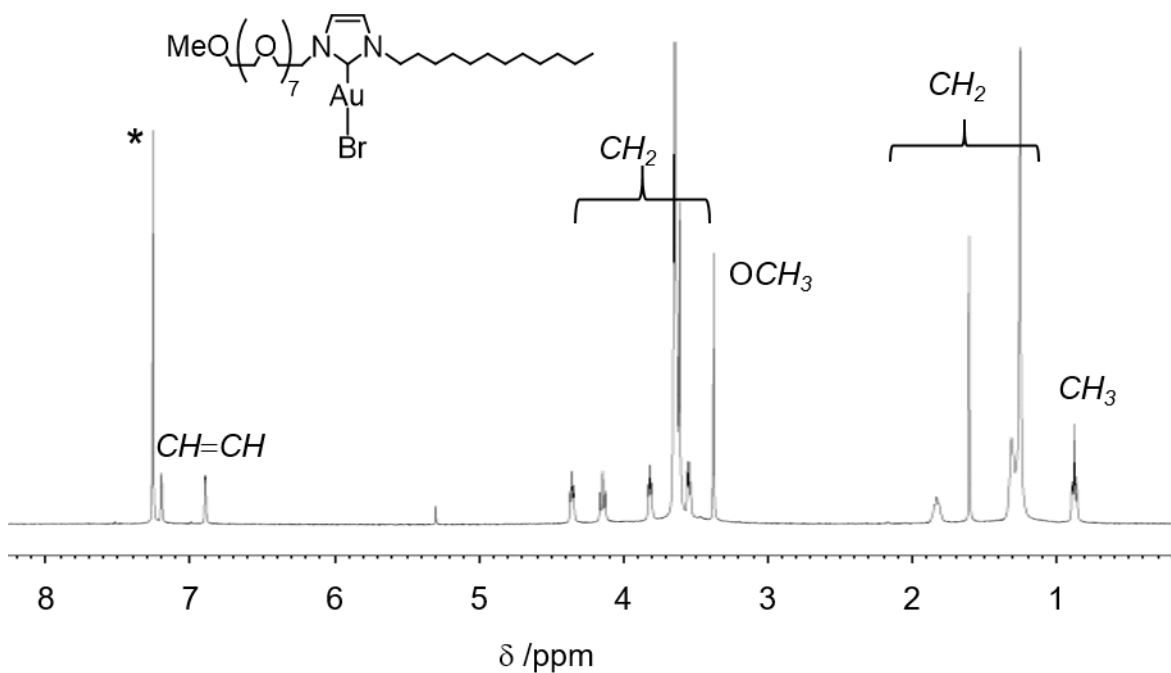

**Fig. S3**  $^1\text{H}$  NMR spectrum of Au-MS (400 MHz,  $\text{CDCl}_3$ , r.t.). Asterisk represents residual solvent.

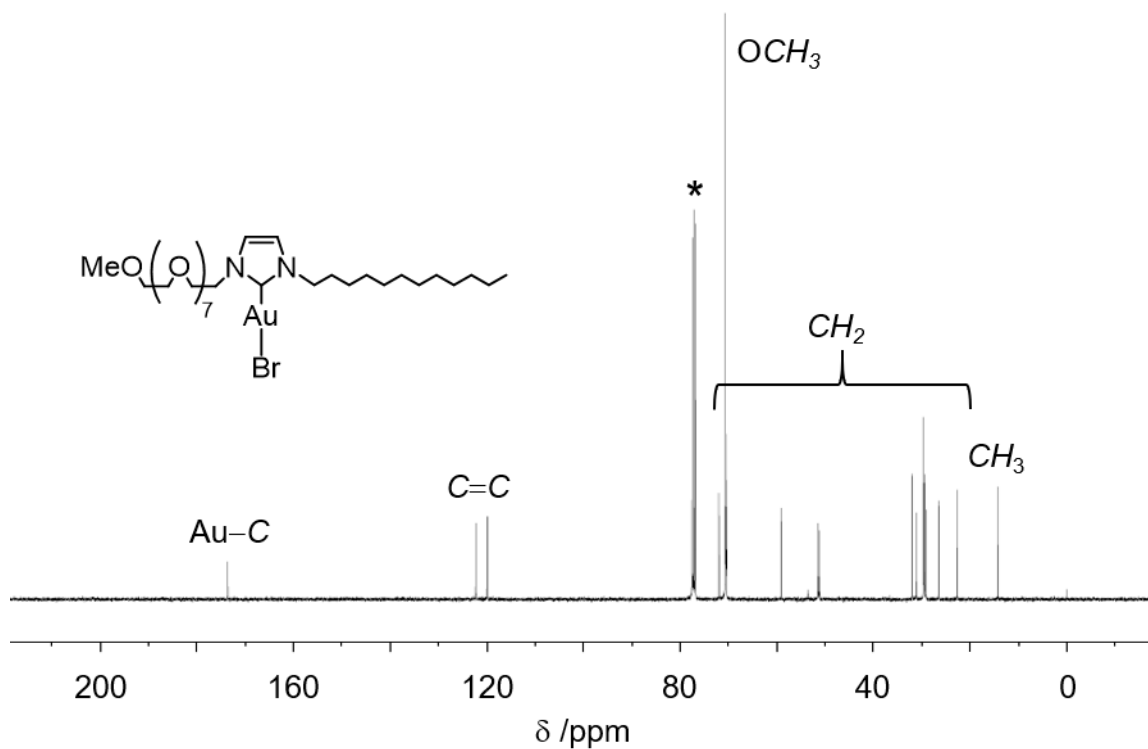

**Fig. S4**  $^{13}\text{C}$  NMR spectrum of Au-MS (100 MHz,  $\text{CDCl}_3$ , r.t.). Asterisk represents residual solvent.

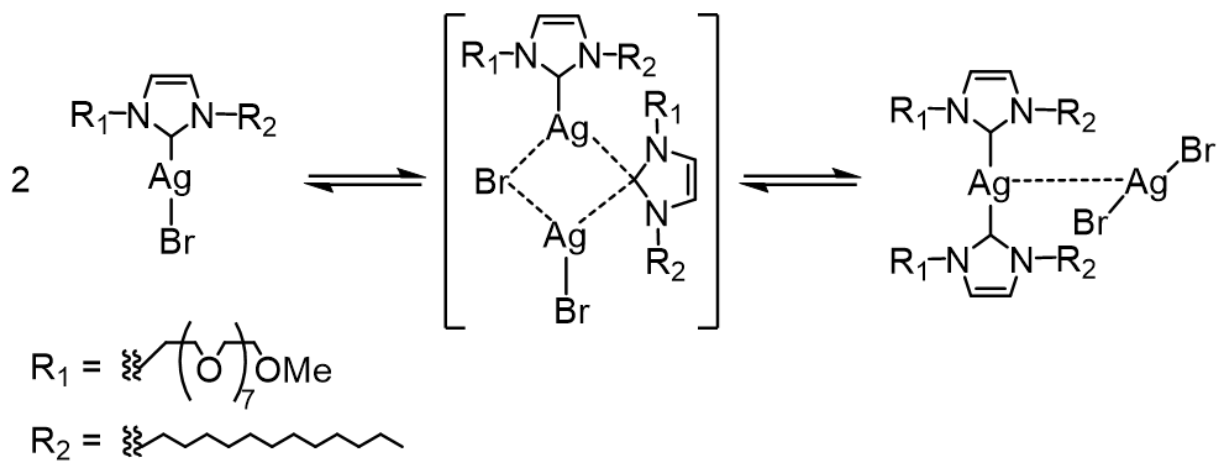

**Fig S5** Proposed fluxional behavior of Ag-MS.

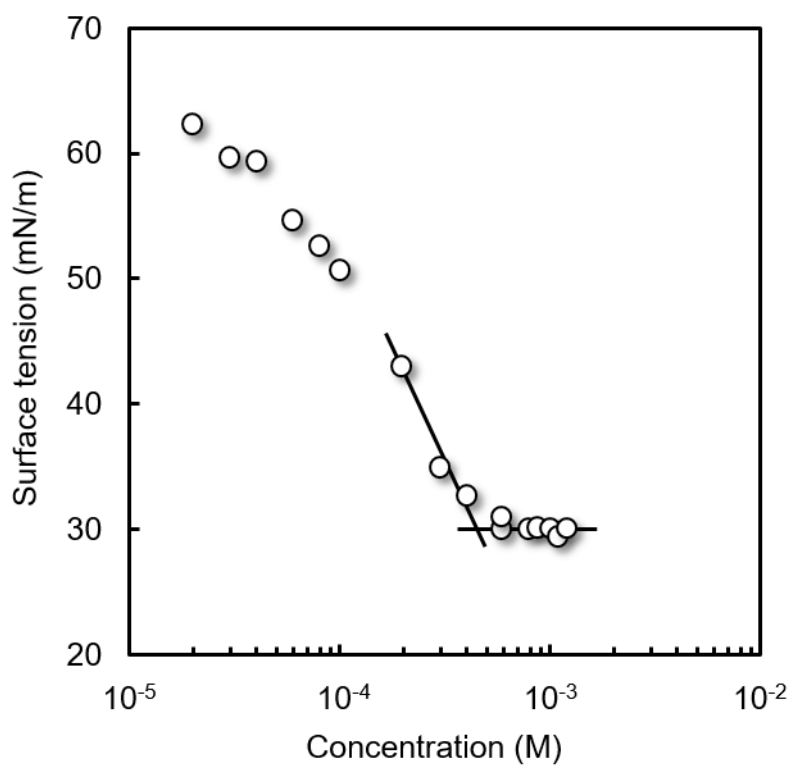

**Fig. S6** Relationship between surface tension and concentration of Ag-MS at 25 °C.

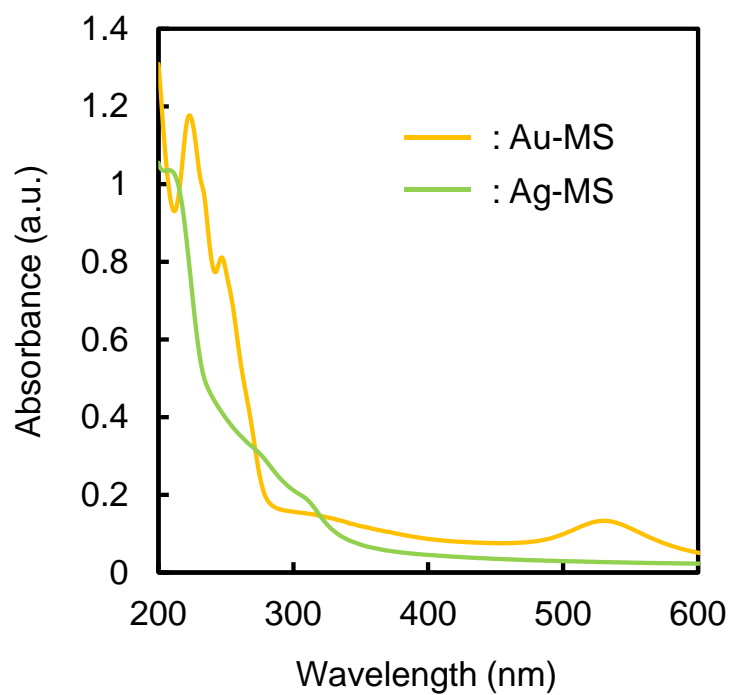

**Fig. S7** UV-vis spectra of Au-MS and Ag-MS in water (0.1 mM, 25 °C).

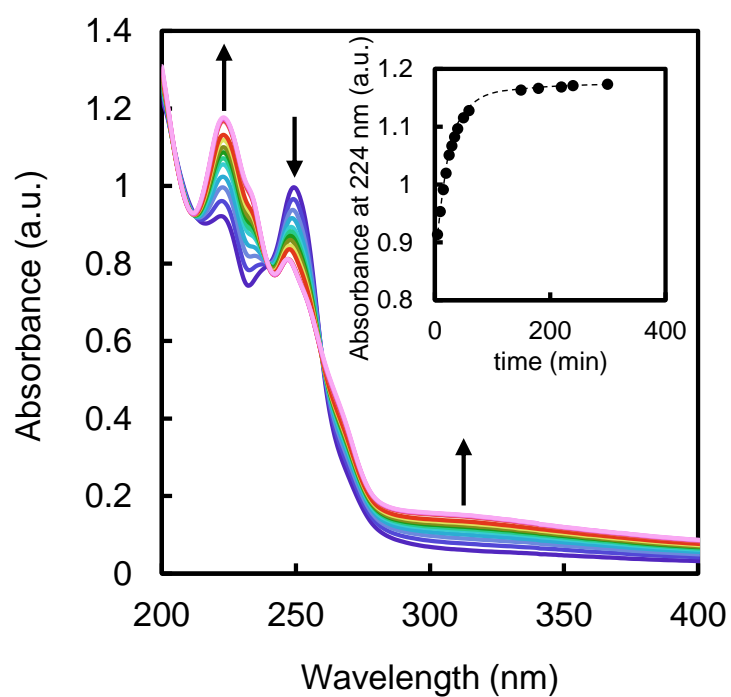

**Fig. S8** Time-dependent UV-vis spectra of Au-MS in water (0.1 mM, 25 °C). The first scan was recorded 5 min after the dissolving Au-MS in water. The inset shows the profile monitored by absorption at 224 nm.

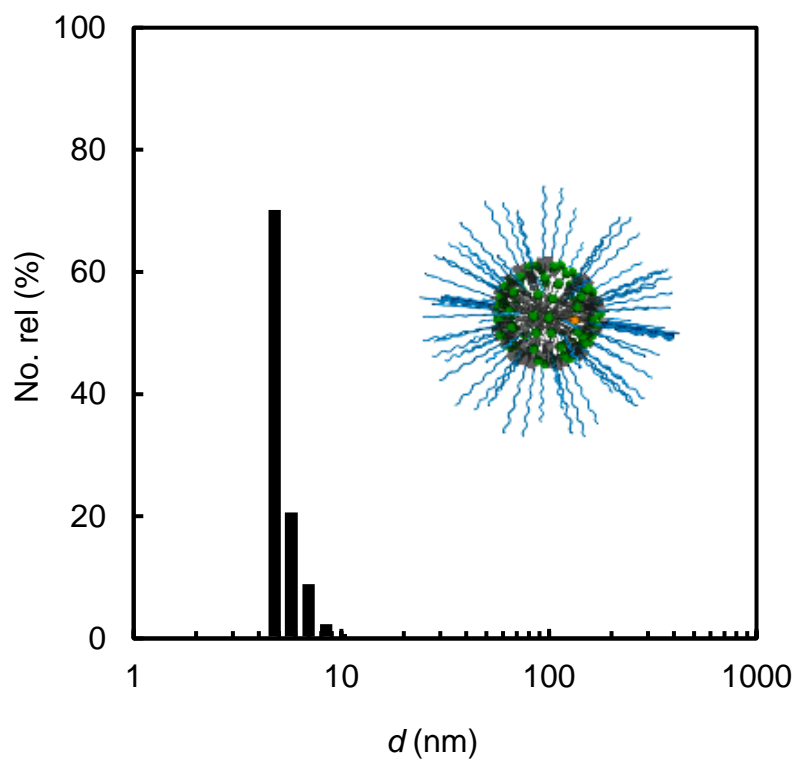

**Fig. S9** DLS histogram of Ag-MS (1 mM at 25 °C).

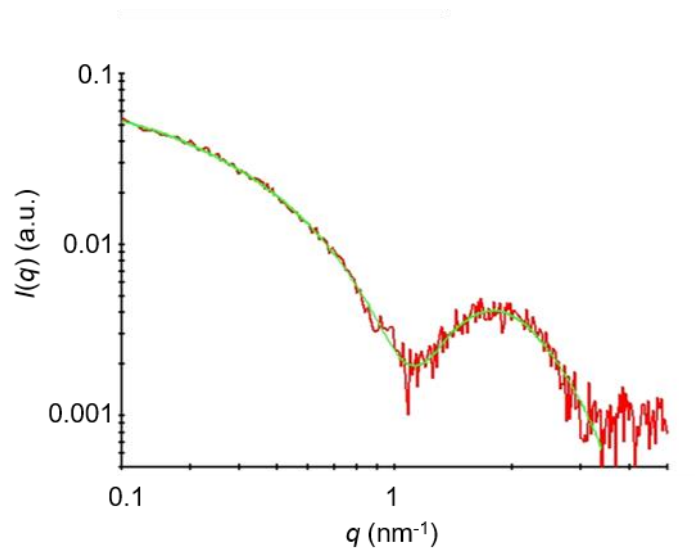

**Fig. S10** The X-ray scattering curves  $I(q)$ , of the 10 mM Pd-MS solution.

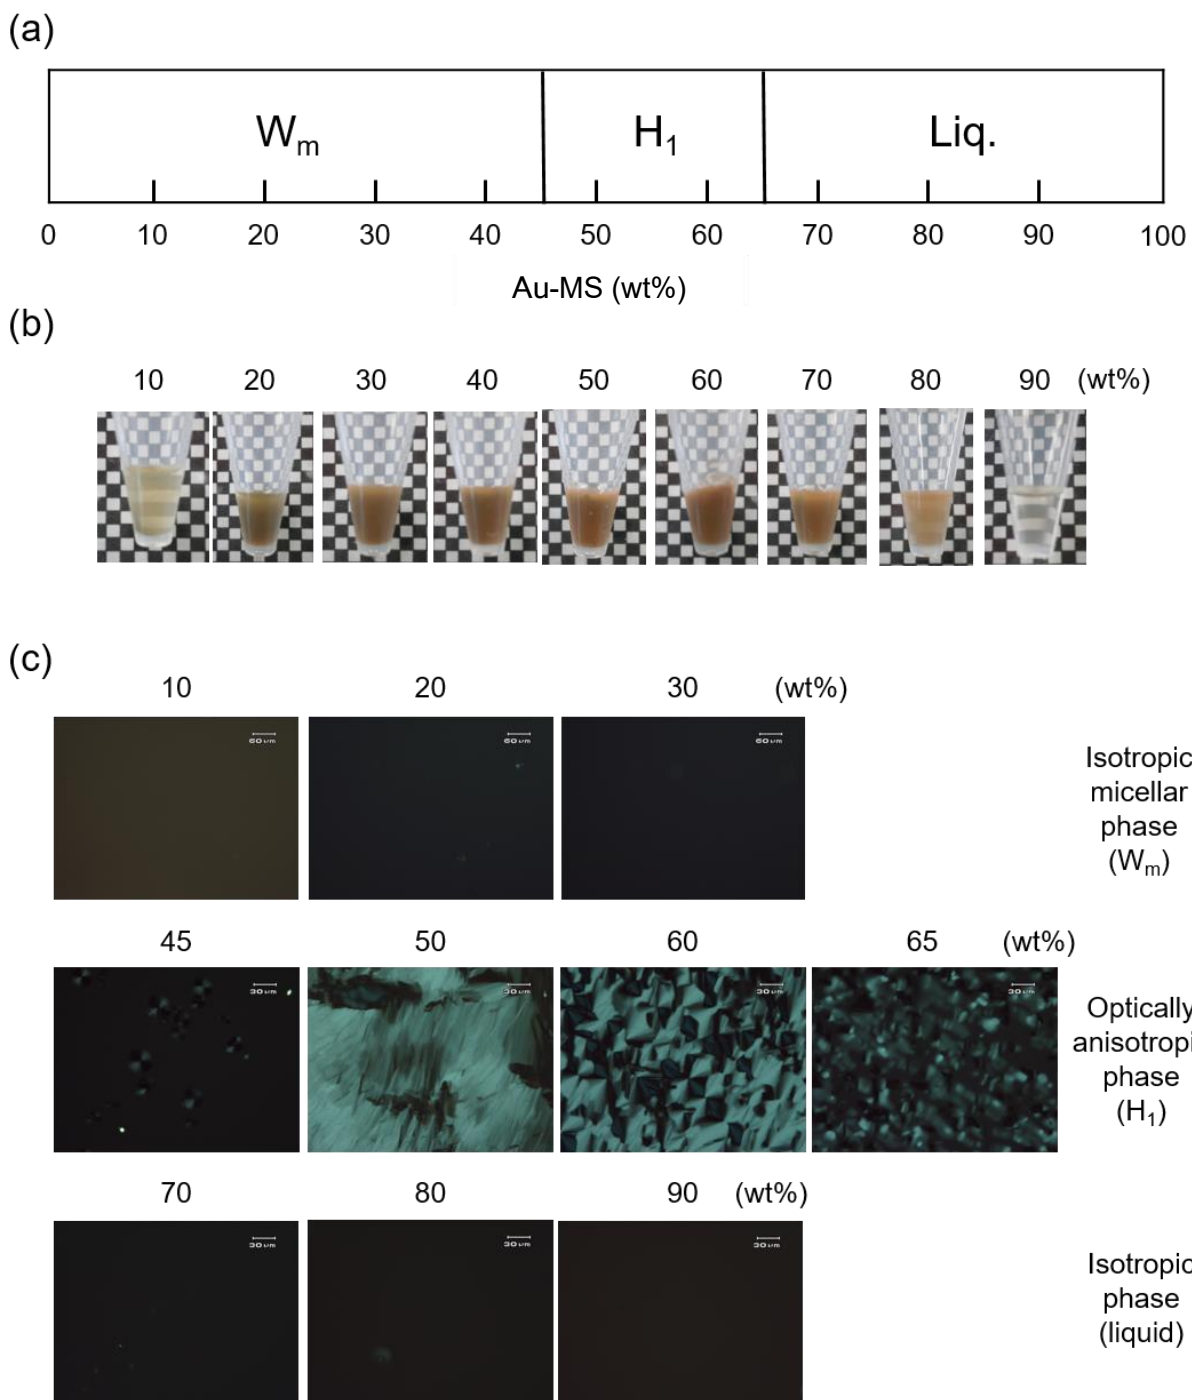

**Fig. S11** (a) Two phase diagram of Au-MS and (b) corresponding visual observations and (c) polarized optical microscopic images of each samples.

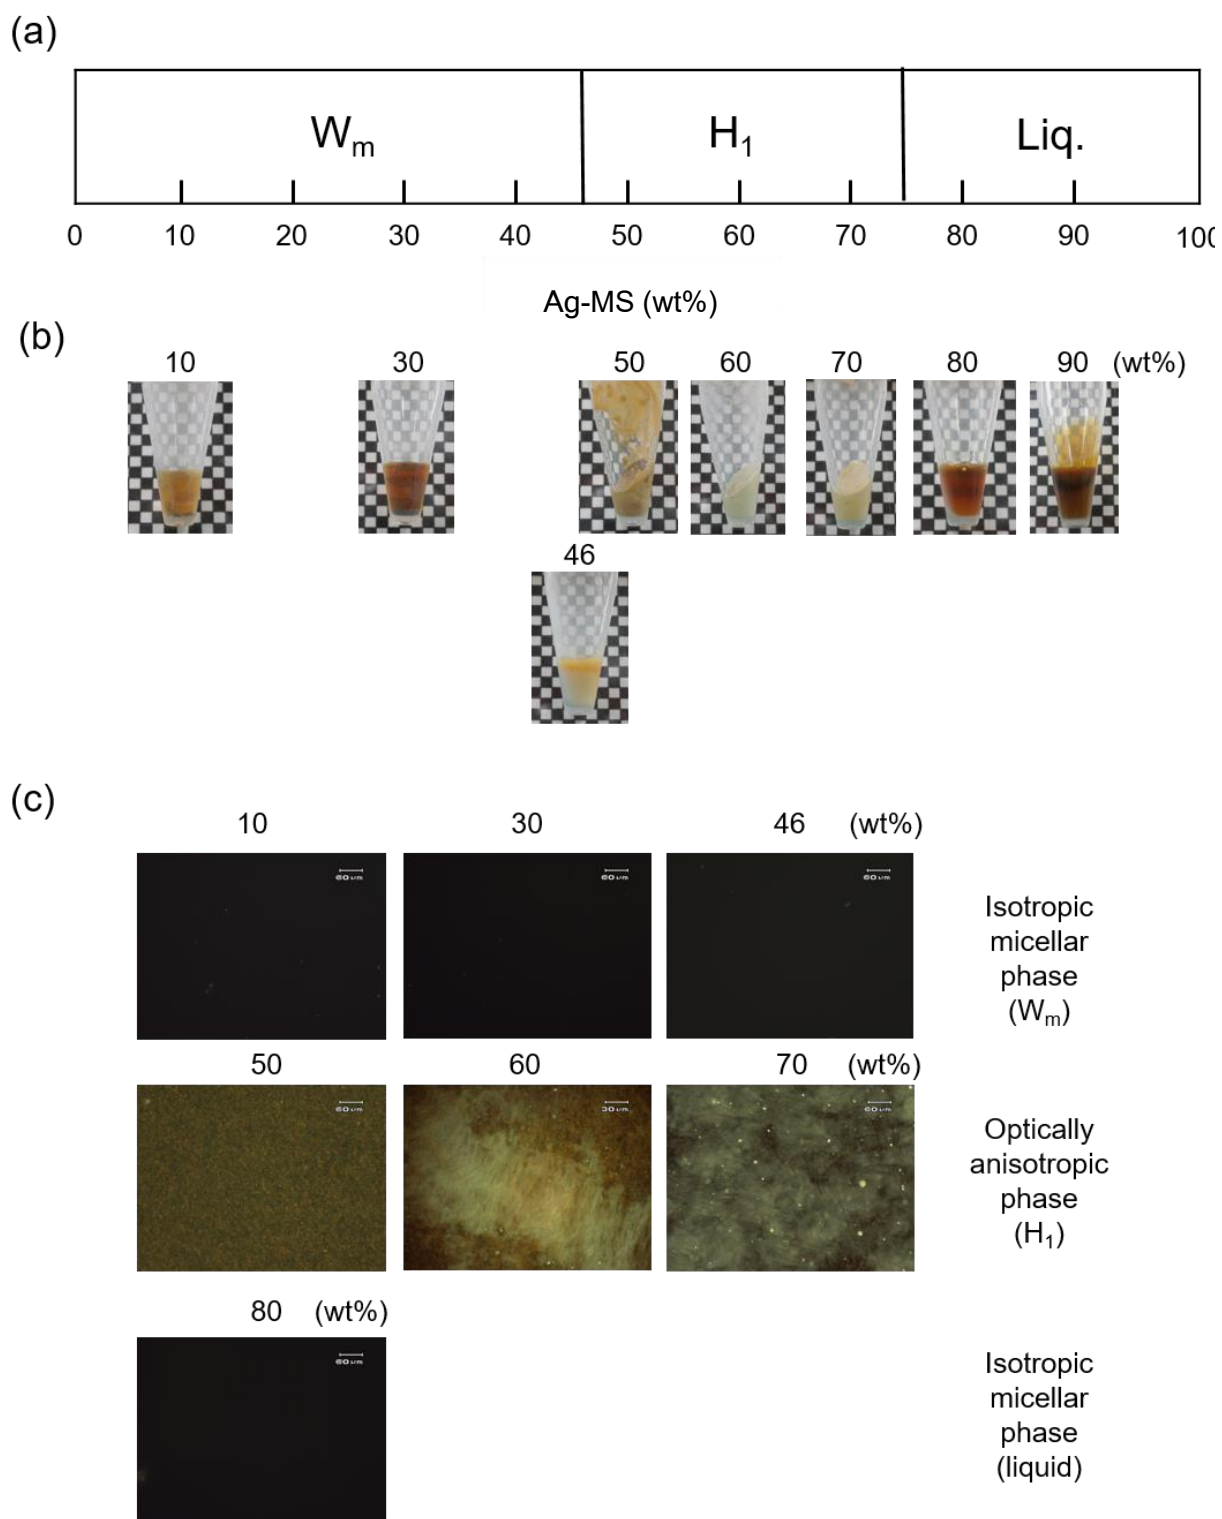

**Fig. S12** (a) Two phase diagram of Ag-MS and (b) corresponding visual observations and (c) polarized optical microscopic images of each samples.



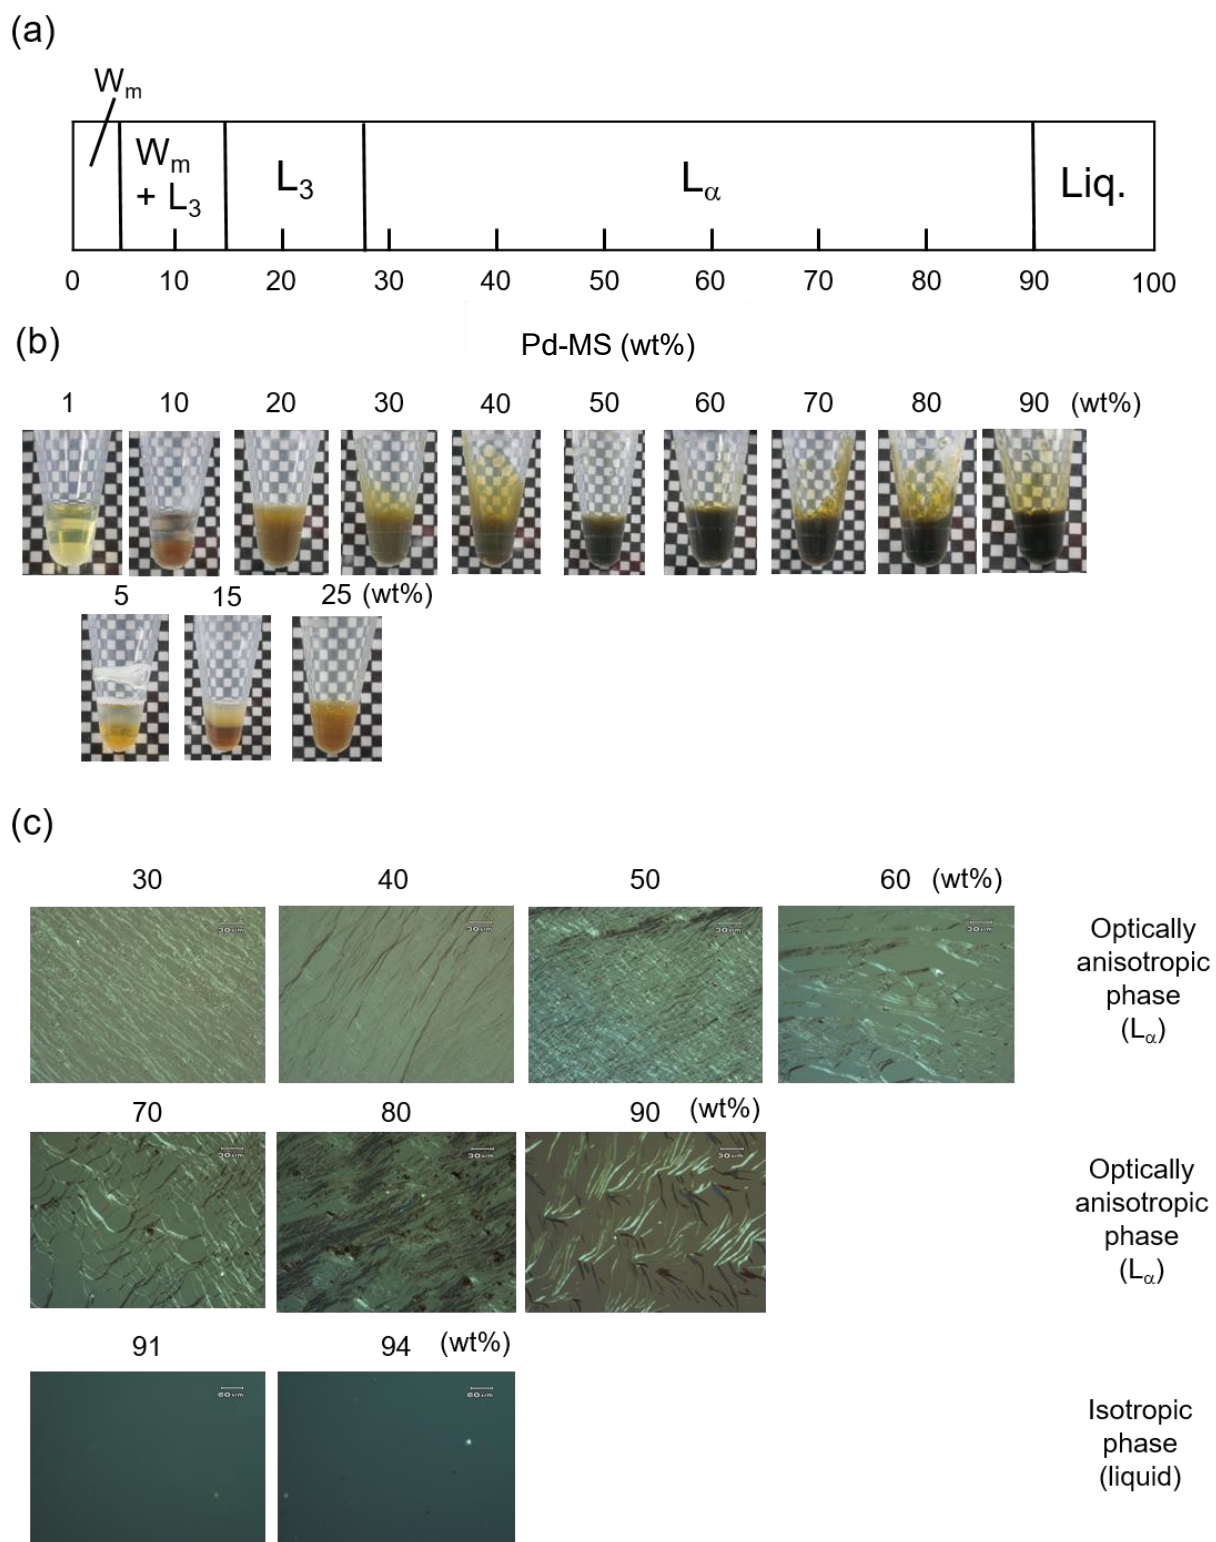

**Fig. S13** (a) Two phase diagram of Pd-MS and (b) corresponding visual observations and (c) polarized optical microscopic images of each samples.
